# Supplementary material for: The effect of a tuberculosis chest X-ray image reference set on non-expert reader performance
Source: Springer Nature journal article supplement (doi:10.1007/s00330-013-2840-z), 2013-05-07
Supplement: MOESM1 [file 8320528]

**Initial Questionnaire**

Participant Number

What is your position?

How many years have you been working as a clinical officer?

How often do you look at Chest X-rays?

Several times a day Once a day 3x week

Once a week Once a month

Have you had any previous training on how to read a chest x-ray?

Yes No

How long ago was this training?

What sort of training was this?
