# Supplementary material for: The effect of a tuberculosis chest X-ray image reference set on non-expert reader performance
Source: Springer Nature journal article supplement (doi:10.1007/s00330-013-2840-z), 2013-05-07
Supplement: MOESM2 [file 8320528]

Participant Number

Chest X-ray Number

Would you treat this as TB? Yes No

How certain are you of your decision?

*100% Sure 60% Sure 30% Sure Not at all Sure*

Chest X-ray Number

Would you treat this as TB? Yes No

How certain are you of your decision?

*100% Sure 60% Sure 30% Sure Not at all Sure*

Chest X-ray Number

Would you treat this as TB? Yes No

How certain are you of your decision?

*100% Sure 60% Sure 30% Sure Not at all Sure*

Chest X-ray Number

Would you treat this as TB? Yes No

How certain are you of your decision?

*100% Sure 60% Sure 30% Sure Not at all Sure*

Chest X-ray Number

Would you treat this as TB? Yes No

How certain are you of your decision?

*100% Sure 60% Sure 30% Sure Not at all Sure*
