# Supplementary material for: The effect of a tuberculosis chest X-ray image reference set on non-expert reader performance
Source: Springer Nature journal article supplement (doi:10.1007/s00330-013-2840-z), 2013-05-07
Supplement: MOESM3 [file 8320528]

**CHEST RADIOGRAPH READING AND RECORDING SYSTEM**

00034113

Use a dark pen. Cross boxes that apply. Do not mark anywhere outside the boxes. Use white stickers to make corrections.

**Radiograph ID**

**Reader ID**

**Date of radiograph**

**Date of reading**

**Film Quality**

- Optimal       Suboptimal       Unreadable

**Comments**

- Too dark/too light     Poor position     Other, specify:

**Parenchymal abnormalities**

|                                     |                                                       |                                                       |                                    |                                       |                                 |          |                          |                          |                              |
|-------------------------------------|-------------------------------------------------------|-------------------------------------------------------|------------------------------------|---------------------------------------|---------------------------------|----------|--------------------------|--------------------------|------------------------------|
| <b>1A Large opacities (&gt;1cm)</b> | <input type="checkbox"/> Y <input type="checkbox"/> N | <input type="checkbox"/> Y <input type="checkbox"/> N | <b>Type</b>                        | <b>Size</b>                           | <b>Extent</b>                   | <b>R</b> | <b>Zones</b>             | <b>L</b>                 | <b>Calcification</b>         |
|                                     |                                                       |                                                       | <input type="checkbox"/> Round     | <input type="checkbox"/> 1 – 5 cm     | <input type="checkbox"/> Single | U        | <input type="checkbox"/> | <input type="checkbox"/> | <input type="checkbox"/> Yes |
|                                     |                                                       |                                                       | <input type="checkbox"/> Irregular | <input type="checkbox"/> > 5 cm       | <input type="checkbox"/> Few    | M        | <input type="checkbox"/> | <input type="checkbox"/> | <input type="checkbox"/> No  |
|                                     |                                                       |                                                       |                                    | <input type="checkbox"/> > upper lobe | <input type="checkbox"/> Many   | L        | <input type="checkbox"/> | <input type="checkbox"/> |                              |
| <b>1B Small opacities (&lt;1cm)</b> | <input type="checkbox"/> Y <input type="checkbox"/> N |                                                       | <b>Type</b>                        | <b>Size</b>                           | <b>Profusion</b>                | <b>R</b> | <b>Zones</b>             | <b>L</b>                 | <b>Calcification</b>         |
|                                     |                                                       |                                                       | <input type="checkbox"/> Round     | <input type="checkbox"/> < 1.5 mm     | <input type="checkbox"/> 1+     | U        | <input type="checkbox"/> | <input type="checkbox"/> | <input type="checkbox"/> Yes |
|                                     |                                                       |                                                       | <input type="checkbox"/> Irregular | <input type="checkbox"/> 1.5 – 3.5 mm | <input type="checkbox"/> 2+     | M        | <input type="checkbox"/> | <input type="checkbox"/> | <input type="checkbox"/> No  |
|                                     |                                                       |                                                       |                                    | <input type="checkbox"/> 3.5 – 10 mm  | <input type="checkbox"/> 3+     | L        | <input type="checkbox"/> | <input type="checkbox"/> |                              |
| <b>1C Cavities</b>                  | <input type="checkbox"/> Y <input type="checkbox"/> N |                                                       |                                    | <b>Maximum size</b>                   | <b>Extent</b>                   | <b>R</b> | <b>Zones</b>             | <b>L</b>                 |                              |
|                                     |                                                       |                                                       |                                    | <input type="checkbox"/> 1 – 5 cm     | <input type="checkbox"/> Single | U        | <input type="checkbox"/> | <input type="checkbox"/> |                              |
|                                     |                                                       |                                                       |                                    | <input type="checkbox"/> > 5 cm       | <input type="checkbox"/> Few    | M        | <input type="checkbox"/> | <input type="checkbox"/> |                              |
|                                     |                                                       |                                                       |                                    | <input type="checkbox"/> > upper lobe | <input type="checkbox"/> Many   | L        | <input type="checkbox"/> | <input type="checkbox"/> |                              |

**Pleural abnormalities**

|                                  |                                                       |                                                       |                                                       |                                                                                          |
|----------------------------------|-------------------------------------------------------|-------------------------------------------------------|-------------------------------------------------------|------------------------------------------------------------------------------------------|
| <b>2A Calcification/Plaque</b>   | <input type="checkbox"/> Y <input type="checkbox"/> N | <input type="checkbox"/> Y <input type="checkbox"/> N | <b>Chest side</b>                                     | <b>Extent of lateral chest wall</b>                                                      |
|                                  |                                                       |                                                       | R <input type="checkbox"/> <input type="checkbox"/> L | <input type="checkbox"/> < ¼ <input type="checkbox"/> ¼ - ½ <input type="checkbox"/> > ½ |
| <b>2B Pleural fluid/Fibrosis</b> | <input type="checkbox"/> Y <input type="checkbox"/> N |                                                       | R <input type="checkbox"/> <input type="checkbox"/> L | <input type="checkbox"/> < ¼ <input type="checkbox"/> ¼ - ½ <input type="checkbox"/> > ½ |
| <b>2C Apical cap</b>             | <input type="checkbox"/> Y <input type="checkbox"/> N |                                                       | R <input type="checkbox"/> <input type="checkbox"/> L |                                                                                          |

**Central abnormalities**

|                              |                                                       |                                                       |                                                                                                                                             |  |
|------------------------------|-------------------------------------------------------|-------------------------------------------------------|---------------------------------------------------------------------------------------------------------------------------------------------|--|
| <b>3A Tracheal deviation</b> | <input type="checkbox"/> Y <input type="checkbox"/> N | <input type="checkbox"/> Y <input type="checkbox"/> N | R <input type="checkbox"/> <input type="checkbox"/> L                                                                                       |  |
| <b>3B Mediastinal shift</b>  | <input type="checkbox"/> Y <input type="checkbox"/> N |                                                       | R <input type="checkbox"/> <input type="checkbox"/> L                                                                                       |  |
| <b>3C Hilar elevation</b>    | <input type="checkbox"/> Y <input type="checkbox"/> N |                                                       | R <input type="checkbox"/> <input type="checkbox"/> L                                                                                       |  |
| <b>3D Lymphadenopathy</b>    | <input type="checkbox"/> Y <input type="checkbox"/> N |                                                       | <b>Hilar</b> R <input type="checkbox"/> <input type="checkbox"/> L <b>Mediastinal</b> R <input type="checkbox"/> <input type="checkbox"/> L |  |

**Other abnormalities**

|                 |                                                        |                 |                                                      |             |                                         |
|-----------------|--------------------------------------------------------|-----------------|------------------------------------------------------|-------------|-----------------------------------------|
| <b>Surgical</b> | <input type="checkbox"/> Bullets/Artifact/Foreign body | <b>Skeletal</b> | <input type="checkbox"/> Rib fracture or abnormality | <b>Lung</b> | <input type="checkbox"/> Hyperinflation |
|                 | <input type="checkbox"/> Suspected lung resection      |                 | <input type="checkbox"/> Spinal abnormality          |             | <input type="checkbox"/> Pneumothorax   |
|                 | <input type="checkbox"/> Sternotomy wire/clips         | <b>Lung</b>     | <input type="checkbox"/> Bullae                      |             | <input type="checkbox"/> Mycetoma       |
| <b>Cardiac</b>  | <input type="checkbox"/> Any abnormality               |                 | <input type="checkbox"/> Bronchiectasis              |             | <input type="checkbox"/> Volume loss    |
|                 |                                                        |                 | <input type="checkbox"/> Suspected cancer            |             |                                         |

- Y  N **Radiograph completely normal**  
 Y  N **Abnormalities consistent with TB**  
      Active TB       Inactive TB
